# Supplementary material
Source: PubMed Central journal article supplement (PMC1838502)
Supplement: pnas_0605321104_6.pdf [file pnas_0605321104_6.pdf]

## STATIONARY ODOR SOURCE ASSAY

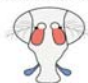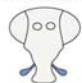

## ODOR FLOW ASSAY

(C.A.S. #) odor name

V.P. C-atoms

Actogram

Activity

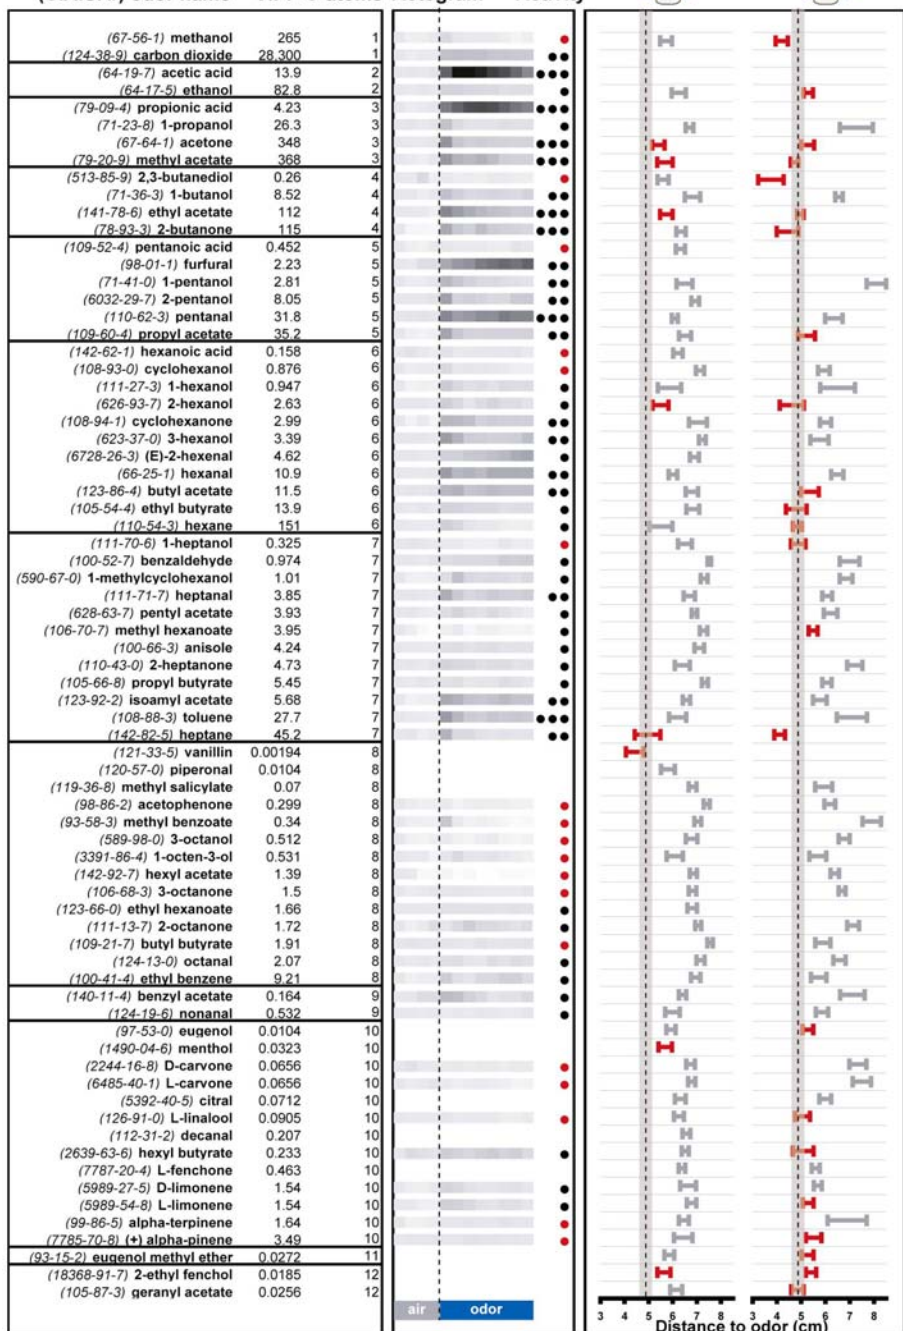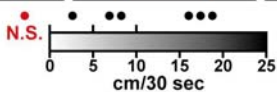

p&lt;0.05

N.S. p&gt;0.05
