# Supplementary material
Source: PubMed Central journal article supplement (PMC1838502)
Supplement: pnas_0605321104_10.pdf [file pnas_0605321104_10.pdf]

|                          |                |                      |                 |
|--------------------------|----------------|----------------------|-----------------|
| <b>peak-plateau</b>      |                |                      |                 |
| 1-hexanol                | D-limonene     | L-limonene           | ethyl hexanoate |
| 2-hexanol                | 1-pentanol     | cyclohexanone        | 3-hexanol       |
| heptanal                 | 2-heptanone    | propyl butyrate      | isoamyl acetate |
| 2-pentanol               | 1-butanol      | ethylbenzene         | hexanal         |
| ethyl butyrate           | 1-propanol     | toluene              | propyl acetate  |
| ethyl acetate            | 2-butanone     | acetone              | methyl acetate  |
| <b>peak</b>              |                |                      |                 |
| benzyl acetate           | heptane        | 1-ethanol            | hexane          |
| <b>plateau</b>           |                |                      |                 |
| hexyl butyrate           | nonanal        | 1-methylcyclohexanol | 2-octanone      |
| octanal                  | pentyl acetate | methyl hexanoate     | propionic acid  |
| anisole                  | butyl acetate  | acetic acid          | carbon dioxide  |
| <b>constant increase</b> |                |                      |                 |
| benzaldehyde             | furfural       | (E)-2-hexenal        | pentanal        |

**Table 1.** Temporal dynamics in the odor flow assay. Responses to the 44 odors eliciting a response in the odor flow assay can be grouped into four response types (peak-plateau: highest activity 0-30 sec after odor onset, no return to baseline; peak: highest activity 0-30 sec, return to baseline; plateau: highest activity 30-150 sec; constant increase: highest activity after 150 sec).
