# Supplementary material
Source: PubMed Central journal article supplement (PMC1838502)
Supplement: pnas_0605321104_12.pdf [file pnas_0605321104_12.pdf]

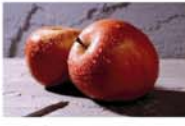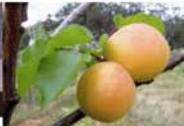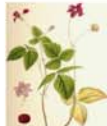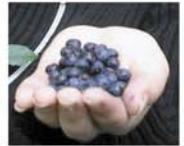

apple

apricot

arctic bramble

beli fruit

bilberry

|                      | apple | apricot | arctic bramble | beli fruit | bilberry |
|----------------------|-------|---------|----------------|------------|----------|
| acetic acid          |       |         |                |            |          |
| propionic acid       |       |         |                |            |          |
| pentanoic acid       |       |         |                |            |          |
| hexanoic acid        |       |         |                |            |          |
| methanol             |       |         |                |            |          |
| ethanol              |       |         |                |            |          |
| 1-propanol           |       |         |                |            |          |
| 1-butanol            |       |         |                |            |          |
| 1-pentanol           |       |         |                |            |          |
| 2-pentanol           |       |         |                |            |          |
| 1-hexanol            |       |         |                |            |          |
| 2-hexanol            |       |         |                |            |          |
| 3-hexanol            |       |         |                |            |          |
| 1-heptanol           |       |         |                |            |          |
| 3-octanol            |       |         |                |            |          |
| 1-octen-3-ol         |       |         |                |            |          |
| 2,3-butanediol       |       |         |                |            |          |
| 2-ethyl fenchol      |       |         |                |            |          |
| cyclohexanol         |       |         |                |            |          |
| 1-methylcyclohexanol |       |         |                |            |          |
| pentanal             |       |         |                |            |          |
| hexanal              |       |         |                |            |          |
| heptanal             |       |         |                |            |          |
| octanal              |       |         |                |            |          |
| nonanal              |       |         |                |            |          |
| decanal              |       |         |                |            |          |
| (E)-2-hexenal        |       |         |                |            |          |
| hexane               |       |         |                |            |          |
| heptane              |       |         |                |            |          |
| acetophenone         |       |         |                |            |          |
| anisole              |       |         |                |            |          |
| benzaldehyde         |       |         |                |            |          |
| benzyl acetate       |       |         |                |            |          |
| ethyl benzene        |       |         |                |            |          |
| eugenol              |       |         |                |            |          |
| eugenol methyl ether |       |         |                |            |          |
| furfural             |       |         |                |            |          |
| methyl salicylate    |       |         |                |            |          |
| methyl benzoate      |       |         |                |            |          |
| piperonal            |       |         |                |            |          |
| toluene              |       |         |                |            |          |
| vanillin             |       |         |                |            |          |
| carbon dioxide       |       |         |                |            |          |
| methyl acetate       |       |         |                |            |          |
| ethyl acetate        |       |         |                |            |          |
| propyl acetate       |       |         |                |            |          |
| butyl acetate        |       |         |                |            |          |
| pentyl acetate       |       |         |                |            |          |
| hexyl acetate        |       |         |                |            |          |
| isoamyl acetate      |       |         |                |            |          |
| ethyl butyrate       |       |         |                |            |          |
| propyl butyrate      |       |         |                |            |          |
| butyl butyrate       |       |         |                |            |          |
| hexyl butyrate       |       |         |                |            |          |
| methyl hexanoate     |       |         |                |            |          |
| ethyl hexanoate      |       |         |                |            |          |
| acetone              |       |         |                |            |          |
| 2-butanone           |       |         |                |            |          |
| 2-heptanone          |       |         |                |            |          |
| 2-octanone           |       |         |                |            |          |
| 3-octanone           |       |         |                |            |          |
| cyclohexanone        |       |         |                |            |          |
| L-fenchone           |       |         |                |            |          |
| (+)-alpha-pinene     |       |         |                |            |          |
| citral               |       |         |                |            |          |
| D-carvone            |       |         |                |            |          |
| L-carvone            |       |         |                |            |          |
| D-limonene           |       |         |                |            |          |
| L-limonene           |       |         |                |            |          |
| geranyl acetate      |       |         |                |            |          |
| L-linalool           |       |         |                |            |          |
| menthol              |       |         |                |            |          |
| alpha-terpinene      |       |         |                |            |          |

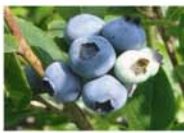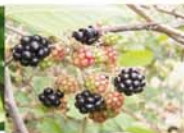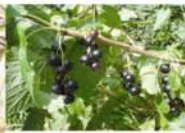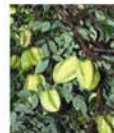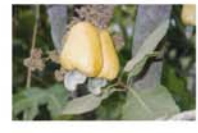

blueberry

blackberry

blackcurrant

carambola

cashew apples

|                      | blueberry | blackberry | blackcurrant | carambola | cashew apples |
|----------------------|-----------|------------|--------------|-----------|---------------|
| acetic acid          |           |            |              |           |               |
| propionic acid       |           |            |              |           |               |
| pentanoic acid       |           |            |              |           |               |
| hexanoic acid        |           |            |              |           |               |
| methanol             |           |            |              |           |               |
| ethanol              |           |            |              |           |               |
| 1-propanol           |           |            |              |           |               |
| 1-butanol            |           |            |              |           |               |
| 1-pentanol           |           |            |              |           |               |
| 2-pentanol           |           |            |              |           |               |
| 1-hexanol            |           |            |              |           |               |
| 2-hexanol            |           |            |              |           |               |
| 3-hexanol            |           |            |              |           |               |
| 1-heptanol           |           |            |              |           |               |
| 3-octanol            |           |            |              |           |               |
| 1-octen-3-ol         |           |            |              |           |               |
| 2,3-butanediol       |           |            |              |           |               |
| 2-ethyl fenchol      |           |            |              |           |               |
| cyclohexanol         |           |            |              |           |               |
| 1-methylcyclohexanol |           |            |              |           |               |
| pentanal             |           |            |              |           |               |
| hexanal              |           |            |              |           |               |
| heptanal             |           |            |              |           |               |
| octanal              |           |            |              |           |               |
| nonanal              |           |            |              |           |               |
| decanal              |           |            |              |           |               |
| (E)-2-hexenal        |           |            |              |           |               |
| hexane               |           |            |              |           |               |
| heptane              |           |            |              |           |               |
| acetophenone         |           |            |              |           |               |
| anisole              |           |            |              |           |               |
| benzaldehyde         |           |            |              |           |               |
| benzyl acetate       |           |            |              |           |               |
| ethyl benzene        |           |            |              |           |               |
| eugenol              |           |            |              |           |               |
| eugenol methyl ether |           |            |              |           |               |
| furfural             |           |            |              |           |               |
| methyl salicylate    |           |            |              |           |               |
| methyl benzoate      |           |            |              |           |               |
| piperonal            |           |            |              |           |               |
| toluene              |           |            |              |           |               |
| vanillin             |           |            |              |           |               |
| carbon dioxide       |           |            |              |           |               |
| methyl acetate       |           |            |              |           |               |
| ethyl acetate        |           |            |              |           |               |
| propyl acetate       |           |            |              |           |               |
| butyl acetate        |           |            |              |           |               |
| pentyl acetate       |           |            |              |           |               |
| hexyl acetate        |           |            |              |           |               |
| isoamyl acetate      |           |            |              |           |               |
| ethyl butyrate       |           |            |              |           |               |
| propyl butyrate      |           |            |              |           |               |
| butyl butyrate       |           |            |              |           |               |
| hexyl butyrate       |           |            |              |           |               |
| methyl hexanoate     |           |            |              |           |               |
| ethyl hexanoate      |           |            |              |           |               |
| acetone              |           |            |              |           |               |
| 2-butanone           |           |            |              |           |               |
| 2-heptanone          |           |            |              |           |               |
| 2-octanone           |           |            |              |           |               |
| 3-octanone           |           |            |              |           |               |
| cyclohexanone        |           |            |              |           |               |
| L-fenchone           |           |            |              |           |               |
| (+) alpha-pinene     |           |            |              |           |               |
| citral               |           |            |              |           |               |
| D-carvone            |           |            |              |           |               |
| L-carvone            |           |            |              |           |               |
| D-limonene           |           |            |              |           |               |
| L-limonene           |           |            |              |           |               |
| geranyl acetate      |           |            |              |           |               |
| L-linalool           |           |            |              |           |               |
| menthol              |           |            |              |           |               |
| alpha-terpinene      |           |            |              |           |               |

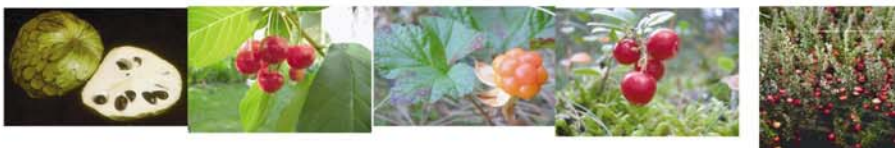

cherimoya fruit

cherry

cloudberry

cowberry

cranberry

|                      | cherimoya fruit | cherry | cloudberry | cowberry | cranberry |
|----------------------|-----------------|--------|------------|----------|-----------|
| acetic acid          |                 |        |            |          |           |
| propionic acid       |                 |        |            |          |           |
| pentanoic acid       |                 |        |            |          |           |
| hexanoic acid        |                 |        |            |          |           |
| methanol             |                 |        |            |          |           |
| ethanol              |                 |        |            |          |           |
| 1-propanol           |                 |        |            |          |           |
| 1-butanol            |                 |        |            |          |           |
| 1-pentanol           |                 |        |            |          |           |
| 2-pentanol           |                 |        |            |          |           |
| 1-hexanol            |                 |        |            |          |           |
| 2-hexanol            |                 |        |            |          |           |
| 3-hexanol            |                 |        |            |          |           |
| 1-heptanol           |                 |        |            |          |           |
| 3-octanol            |                 |        |            |          |           |
| 1-octen-3-ol         |                 |        |            |          |           |
| 2,3-butanediol       |                 |        |            |          |           |
| 2-ethyl fenchol      |                 |        |            |          |           |
| cyclohexanol         |                 |        |            |          |           |
| 1-methylcyclohexanol |                 |        |            |          |           |
| pentanal             |                 |        |            |          |           |
| hexanal              |                 |        |            |          |           |
| heptanal             |                 |        |            |          |           |
| octanal              |                 |        |            |          |           |
| nonanal              |                 |        |            |          |           |
| decanal              |                 |        |            |          |           |
| (E)-2-hexenal        |                 |        |            |          |           |
| hexane               |                 |        |            |          |           |
| heptane              |                 |        |            |          |           |
| acetophenone         |                 |        |            |          |           |
| anisole              |                 |        |            |          |           |
| benzaldehyde         |                 |        |            |          |           |
| benzyl acetate       |                 |        |            |          |           |
| ethyl benzene        |                 |        |            |          |           |
| eugenol              |                 |        |            |          |           |
| eugenol methyl ether |                 |        |            |          |           |
| furfural             |                 |        |            |          |           |
| methyl salicylate    |                 |        |            |          |           |
| methyl benzoate      |                 |        |            |          |           |
| piperonal            |                 |        |            |          |           |
| toluene              |                 |        |            |          |           |
| vanillin             |                 |        |            |          |           |
| carbon dioxide       |                 |        |            |          |           |
| methyl acetate       |                 |        |            |          |           |
| ethyl acetate        |                 |        |            |          |           |
| propyl acetate       |                 |        |            |          |           |
| butyl acetate        |                 |        |            |          |           |
| pentyl acetate       |                 |        |            |          |           |
| hexyl acetate        |                 |        |            |          |           |
| isoamyl acetate      |                 |        |            |          |           |
| ethyl butyrate       |                 |        |            |          |           |
| propyl butyrate      |                 |        |            |          |           |
| butyl butyrate       |                 |        |            |          |           |
| hexyl butyrate       |                 |        |            |          |           |
| methyl hexanoate     |                 |        |            |          |           |
| ethyl hexanoate      |                 |        |            |          |           |
| acetone              |                 |        |            |          |           |
| 2-butanone           |                 |        |            |          |           |
| 2-heptanone          |                 |        |            |          |           |
| 2-octanone           |                 |        |            |          |           |
| 3-octanone           |                 |        |            |          |           |
| cyclohexanone        |                 |        |            |          |           |
| L-fenchone           |                 |        |            |          |           |
| (+) alpha-pinene     |                 |        |            |          |           |
| citral               |                 |        |            |          |           |
| D-carvone            |                 |        |            |          |           |
| L-carvone            |                 |        |            |          |           |
| D-limonene           |                 |        |            |          |           |
| L-limonene           |                 |        |            |          |           |
| geranyl acetate      |                 |        |            |          |           |
| L-linalool           |                 |        |            |          |           |
| menthol              |                 |        |            |          |           |
| alpha-terpinene      |                 |        |            |          |           |

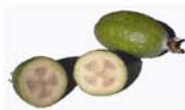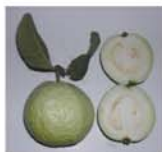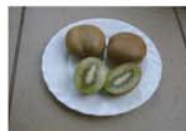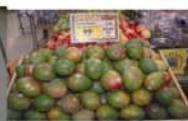

|                      | dalieb | feijoa | guava | kiwifruit | mango |
|----------------------|--------|--------|-------|-----------|-------|
| acetic acid          |        |        |       |           |       |
| propionic acid       |        |        |       |           |       |
| pentanoic acid       |        |        |       |           |       |
| hexanoic acid        |        |        |       |           |       |
| methanol             |        |        |       |           |       |
| ethanol              |        |        |       |           |       |
| 1-propanol           |        |        |       |           |       |
| 1-butanol            |        |        |       |           |       |
| 1-pentanol           |        |        |       |           |       |
| 2-pentanol           |        |        |       |           |       |
| 1-hexanol            |        |        |       |           |       |
| 2-hexanol            |        |        |       |           |       |
| 3-hexanol            |        |        |       |           |       |
| 1-heptanol           |        |        |       |           |       |
| 3-octanol            |        |        |       |           |       |
| 1-octen-3-ol         |        |        |       |           |       |
| 2,3-butanediol       |        |        |       |           |       |
| 2-ethyl fenchol      |        |        |       |           |       |
| cvclohexanol         |        |        |       |           |       |
| 1-methylcvclohexanol |        |        |       |           |       |
| pentanal             |        |        |       |           |       |
| hexanal              |        |        |       |           |       |
| heptanal             |        |        |       |           |       |
| octanal              |        |        |       |           |       |
| nonanal              |        |        |       |           |       |
| decanal              |        |        |       |           |       |
| (E)-2-hexenal        |        |        |       |           |       |
| hexane               |        |        |       |           |       |
| heptane              |        |        |       |           |       |
| acetophenone         |        |        |       |           |       |
| anisole              |        |        |       |           |       |
| benzaldehyde         |        |        |       |           |       |
| benzyl acetate       |        |        |       |           |       |
| ethyl benzene        |        |        |       |           |       |
| eugenol              |        |        |       |           |       |
| eugenol methyl ether |        |        |       |           |       |
| furfural             |        |        |       |           |       |
| methyl salicylate    |        |        |       |           |       |
| methyl benzoate      |        |        |       |           |       |
| piperonal            |        |        |       |           |       |
| toluene              |        |        |       |           |       |
| vanillin             |        |        |       |           |       |
| carbon dioxide       |        |        |       |           |       |
| methyl acetate       |        |        |       |           |       |
| ethyl acetate        |        |        |       |           |       |
| propyl acetate       |        |        |       |           |       |
| butyl acetate        |        |        |       |           |       |
| pentyl acetate       |        |        |       |           |       |
| hexyl acetate        |        |        |       |           |       |
| isoamyl acetate      |        |        |       |           |       |
| ethyl butyrate       |        |        |       |           |       |
| propyl butyrate      |        |        |       |           |       |
| butyl butyrate       |        |        |       |           |       |
| hexyl butyrate       |        |        |       |           |       |
| methyl hexanoate     |        |        |       |           |       |
| ethyl hexanoate      |        |        |       |           |       |
| acetone              |        |        |       |           |       |
| 2-butanone           |        |        |       |           |       |
| 2-heptanone          |        |        |       |           |       |
| 2-octanone           |        |        |       |           |       |
| 3-octanone           |        |        |       |           |       |
| cvclohexanone        |        |        |       |           |       |
| L-fenchone           |        |        |       |           |       |
| (+) alpha-pinene     |        |        |       |           |       |
| citral               |        |        |       |           |       |
| D-carvone            |        |        |       |           |       |
| L-carvone            |        |        |       |           |       |
| D-limonene           |        |        |       |           |       |
| L-limonene           |        |        |       |           |       |
| geranyl acetate      |        |        |       |           |       |
| L-linalool           |        |        |       |           |       |
| menthol              |        |        |       |           |       |
| alpha-terpinene      |        |        |       |           |       |

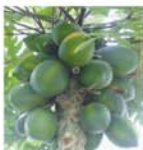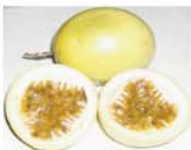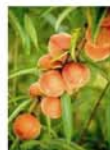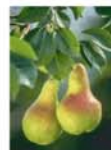

mountain papaya

papaya

passion fruit

peach

pear

|                      | mountain papaya | papaya | passion fruit | peach | pear |
|----------------------|-----------------|--------|---------------|-------|------|
| acetic acid          |                 |        |               |       |      |
| propionic acid       |                 |        |               |       |      |
| pentanoic acid       |                 |        |               |       |      |
| hexanoic acid        |                 |        |               |       |      |
| methanol             |                 |        |               |       |      |
| ethanol              |                 |        |               |       |      |
| 1-propanol           |                 |        |               |       |      |
| 1-butanol            |                 |        |               |       |      |
| 1-pentanol           |                 |        |               |       |      |
| 2-pentanol           |                 |        |               |       |      |
| 1-hexanol            |                 |        |               |       |      |
| 2-hexanol            |                 |        |               |       |      |
| 3-hexanol            |                 |        |               |       |      |
| 1-heptanol           |                 |        |               |       |      |
| 3-octanol            |                 |        |               |       |      |
| 1-octen-3-ol         |                 |        |               |       |      |
| 2,3-butanediol       |                 |        |               |       |      |
| 2-ethyl fenchol      |                 |        |               |       |      |
| cyclohexanol         |                 |        |               |       |      |
| 1-methylcyclohexanol |                 |        |               |       |      |
| pentanal             |                 |        |               |       |      |
| hexanal              |                 |        |               |       |      |
| heptanal             |                 |        |               |       |      |
| octanal              |                 |        |               |       |      |
| nonanal              |                 |        |               |       |      |
| decanal              |                 |        |               |       |      |
| (E)-2-hexenal        |                 |        |               |       |      |
| hexane               |                 |        |               |       |      |
| heptane              |                 |        |               |       |      |
| acetophenone         |                 |        |               |       |      |
| anisole              |                 |        |               |       |      |
| benzaldehyde         |                 |        |               |       |      |
| benzyl acetate       |                 |        |               |       |      |
| ethyl benzene        |                 |        |               |       |      |
| eugenol              |                 |        |               |       |      |
| eugenol methyl ether |                 |        |               |       |      |
| furfural             |                 |        |               |       |      |
| methyl salicylate    |                 |        |               |       |      |
| methyl benzoate      |                 |        |               |       |      |
| piperonal            |                 |        |               |       |      |
| toluene              |                 |        |               |       |      |
| vanillin             |                 |        |               |       |      |
| carbon dioxide       |                 |        |               |       |      |
| methyl acetate       |                 |        |               |       |      |
| ethyl acetate        |                 |        |               |       |      |
| propyl acetate       |                 |        |               |       |      |
| butyl acetate        |                 |        |               |       |      |
| pentyl acetate       |                 |        |               |       |      |
| hexyl acetate        |                 |        |               |       |      |
| isoamyl acetate      |                 |        |               |       |      |
| ethyl butyrate       |                 |        |               |       |      |
| propyl butyrate      |                 |        |               |       |      |
| butyl butyrate       |                 |        |               |       |      |
| hexyl butyrate       |                 |        |               |       |      |
| methyl hexanoate     |                 |        |               |       |      |
| ethyl hexanoate      |                 |        |               |       |      |
| acetone              |                 |        |               |       |      |
| 2-butanone           |                 |        |               |       |      |
| 2-heptanone          |                 |        |               |       |      |
| 2-octanone           |                 |        |               |       |      |
| 3-octanone           |                 |        |               |       |      |
| cyclohexanone        |                 |        |               |       |      |
| L-fenchone           |                 |        |               |       |      |
| (+) alpha-pinene     |                 |        |               |       |      |
| citral               |                 |        |               |       |      |
| D-carvone            |                 |        |               |       |      |
| L-carvone            |                 |        |               |       |      |
| D-limonene           |                 |        |               |       |      |
| L-limonene           |                 |        |               |       |      |
| geranyl acetate      |                 |        |               |       |      |
| L-linalool           |                 |        |               |       |      |
| menthol              |                 |        |               |       |      |
| alpha-terpinene      |                 |        |               |       |      |

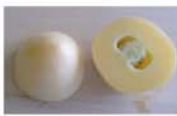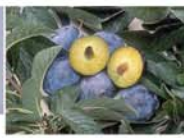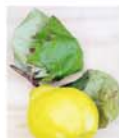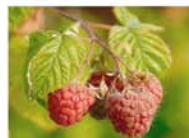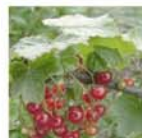

pepino

plum

quince

raspberry

red currants

|                      | pepino | plum | quince | raspberry | red currants |
|----------------------|--------|------|--------|-----------|--------------|
| acetic acid          |        |      |        |           |              |
| propionic acid       |        |      |        |           |              |
| pentanoic acid       |        |      |        |           |              |
| hexanoic acid        |        |      |        |           |              |
| methanol             |        |      |        |           |              |
| ethanol              |        |      |        |           |              |
| 1-propanol           |        |      |        |           |              |
| 1-butanol            |        |      |        |           |              |
| 1-pentanol           |        |      |        |           |              |
| 2-pentanol           |        |      |        |           |              |
| 1-hexanol            |        |      |        |           |              |
| 2-hexanol            |        |      |        |           |              |
| 3-hexanol            |        |      |        |           |              |
| 1-heptanol           |        |      |        |           |              |
| 3-octanol            |        |      |        |           |              |
| 1-octen-3-ol         |        |      |        |           |              |
| 2,3-butanediol       |        |      |        |           |              |
| 2-ethyl fenchol      |        |      |        |           |              |
| cyclohexanol         |        |      |        |           |              |
| 1-methylcyclohexanol |        |      |        |           |              |
| pentanal             |        |      |        |           |              |
| hexanal              |        |      |        |           |              |
| heptanal             |        |      |        |           |              |
| octanal              |        |      |        |           |              |
| nonanal              |        |      |        |           |              |
| decanal              |        |      |        |           |              |
| (E)-2-hexenal        |        |      |        |           |              |
| hexane               |        |      |        |           |              |
| heptane              |        |      |        |           |              |
| acetophenone         |        |      |        |           |              |
| anisole              |        |      |        |           |              |
| benzaldehyde         |        |      |        |           |              |
| benzyl acetate       |        |      |        |           |              |
| ethyl benzene        |        |      |        |           |              |
| eugenol              |        |      |        |           |              |
| eugenol methyl ether |        |      |        |           |              |
| furfural             |        |      |        |           |              |
| methyl salicylate    |        |      |        |           |              |
| methyl benzoate      |        |      |        |           |              |
| dipiperonal          |        |      |        |           |              |
| toluene              |        |      |        |           |              |
| vanillin             |        |      |        |           |              |
| carbon dioxide       |        |      |        |           |              |
| methyl acetate       |        |      |        |           |              |
| ethyl acetate        |        |      |        |           |              |
| propyl acetate       |        |      |        |           |              |
| butyl acetate        |        |      |        |           |              |
| pentyl acetate       |        |      |        |           |              |
| hexyl acetate        |        |      |        |           |              |
| isoamyl acetate      |        |      |        |           |              |
| ethyl butyrate       |        |      |        |           |              |
| propyl butyrate      |        |      |        |           |              |
| butyl butyrate       |        |      |        |           |              |
| hexyl butyrate       |        |      |        |           |              |
| methyl hexanoate     |        |      |        |           |              |
| ethyl hexanoate      |        |      |        |           |              |
| acetone              |        |      |        |           |              |
| 2-butanone           |        |      |        |           |              |
| 2-heptanone          |        |      |        |           |              |
| 2-octanone           |        |      |        |           |              |
| 3-octanone           |        |      |        |           |              |
| cyclohexanone        |        |      |        |           |              |
| L-fenchone           |        |      |        |           |              |
| (+) alpha-pinene     |        |      |        |           |              |
| citral               |        |      |        |           |              |
| D-carvone            |        |      |        |           |              |
| L-carvone            |        |      |        |           |              |
| D-limonene           |        |      |        |           |              |
| L-limonene           |        |      |        |           |              |
| caryophyll acetate   |        |      |        |           |              |
| L-linalool           |        |      |        |           |              |
| menthol              |        |      |        |           |              |
| alpha-terpinene      |        |      |        |           |              |

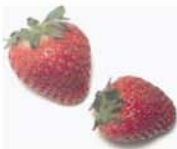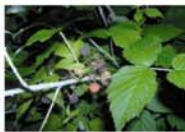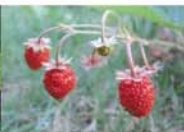

strawberry

wild raspberry

wild strawberry

|                      | strawberry | wild raspberry | wild strawberry |
|----------------------|------------|----------------|-----------------|
| acetic acid          |            |                |                 |
| propionic acid       |            |                |                 |
| pentanoic acid       |            |                |                 |
| hexanoic acid        |            |                |                 |
| methanol             |            |                |                 |
| ethanol              |            |                |                 |
| 1-propanol           |            |                |                 |
| 1-butanol            |            |                |                 |
| 1-pentanol           |            |                |                 |
| 2-pentanol           |            |                |                 |
| 1-hexanol            |            |                |                 |
| 2-hexanol            |            |                |                 |
| 3-hexanol            |            |                |                 |
| 1-heptanol           |            |                |                 |
| 3-octanol            |            |                |                 |
| 1-octen-3-ol         |            |                |                 |
| 2,3-butanediol       |            |                |                 |
| 2-ethyl fenchol      |            |                |                 |
| cyclohexanol         |            |                |                 |
| 1-methylcyclohexanol |            |                |                 |
| pentanal             |            |                |                 |
| hexanal              |            |                |                 |
| heptanal             |            |                |                 |
| octanal              |            |                |                 |
| nonanal              |            |                |                 |
| decanal              |            |                |                 |
| (E)-2-hexenal        |            |                |                 |
| hexane               |            |                |                 |
| heptane              |            |                |                 |
| acetophenone         |            |                |                 |
| anisole              |            |                |                 |
| benzaldehyde         |            |                |                 |
| benzyl acetate       |            |                |                 |
| ethyl benzene        |            |                |                 |
| eugenol              |            |                |                 |
| methyl ether         |            |                |                 |
| furfural             |            |                |                 |
| methyl salicylate    |            |                |                 |
| methyl benzoate      |            |                |                 |
| piperonal            |            |                |                 |
| toluene              |            |                |                 |
| vanillin             |            |                |                 |
| carbon dioxide       |            |                |                 |
| methyl acetate       |            |                |                 |
| ethyl acetate        |            |                |                 |
| propyl acetate       |            |                |                 |
| butyl acetate        |            |                |                 |
| pentyl acetate       |            |                |                 |
| hexyl acetate        |            |                |                 |
| isoamyl acetate      |            |                |                 |
| ethyl butyrate       |            |                |                 |
| propyl butyrate      |            |                |                 |
| butyl butyrate       |            |                |                 |
| hexyl butyrate       |            |                |                 |
| methyl hexanoate     |            |                |                 |
| ethyl hexanoate      |            |                |                 |
| acetone              |            |                |                 |
| 2-butanone           |            |                |                 |
| 2-heptanone          |            |                |                 |
| 2-octanone           |            |                |                 |
| 3-octanone           |            |                |                 |
| cyclohexanone        |            |                |                 |
| L-fenchone           |            |                |                 |
| (+) alpha-pinene     |            |                |                 |
| citral               |            |                |                 |
| D-carvone            |            |                |                 |
| L-carvone            |            |                |                 |
| D-limonene           |            |                |                 |
| L-limonene           |            |                |                 |
| cinnamyl acetate     |            |                |                 |
| L-linalool           |            |                |                 |
| menthol              |            |                |                 |
| alpha-terpinene      |            |                |                 |

**Table 3.** Volatile chemicals in fruits. The table entries are shaded to indicate whether compounds are found in fruit (9) using the following scheme: dark orange: chemical found in the fruit; light orange: chemical found in the fruit but enantiomer not specified; white: chemical not found in fruit. Images are from <http://commons.wikimedia.org> and are either in the Public Domain or are free content under the GNU Free Documentation License or the GNU General Public License.
