# Supplementary material
Source: PubMed Central journal article supplement (PMC1838502)

A

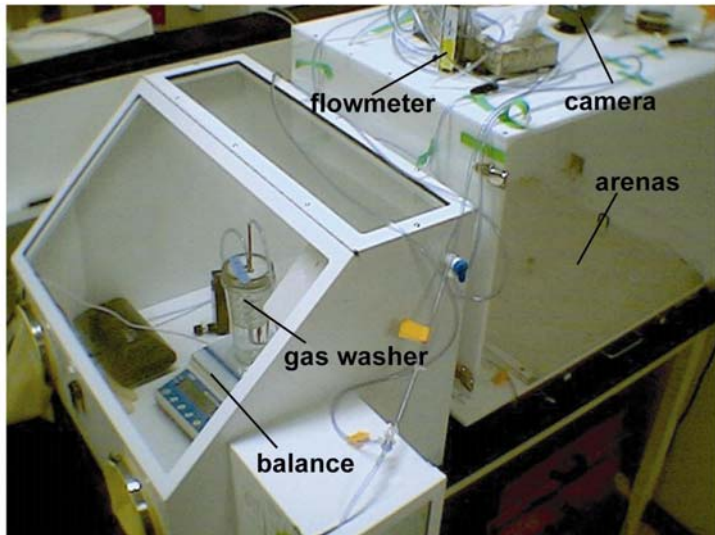

B

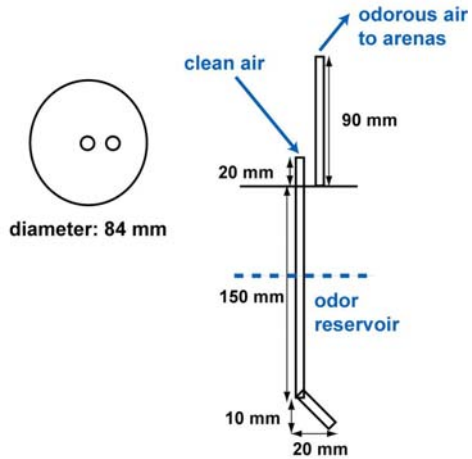

Supplement: pnas_0605321104_1.pdf [file pnas_0605321104_1.pdf]

**A**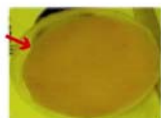

↪ Odor source

0 s

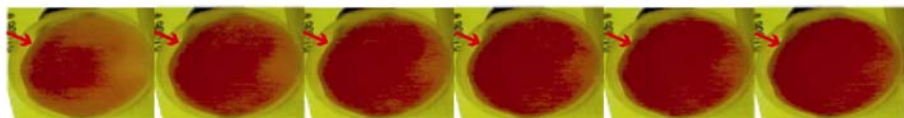

10 s

20 s

30 s

40 s

50 s

60 s

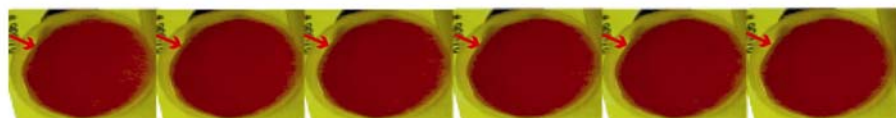

90 s

120 s

150 s

180 s

210 s

240 s

**B**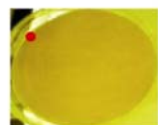

● Odor source

0 s

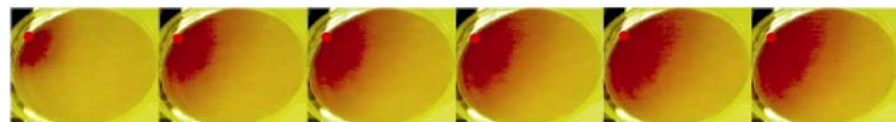

10 s

20 s

30 s

40 s

50 s

60 s

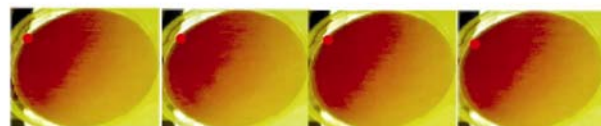

90 s

120 s

150 s

180 s

Supplement: pnas_0605321104_2.pdf [file pnas_0605321104_2.pdf]

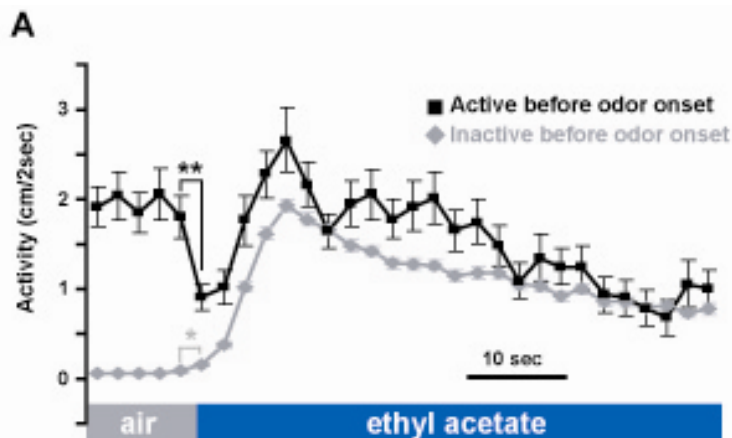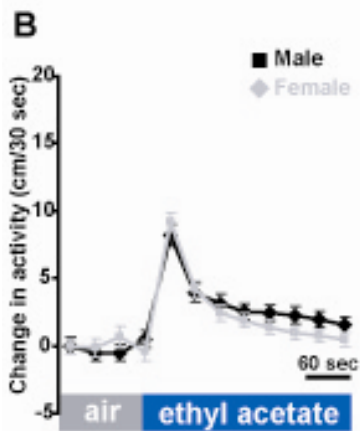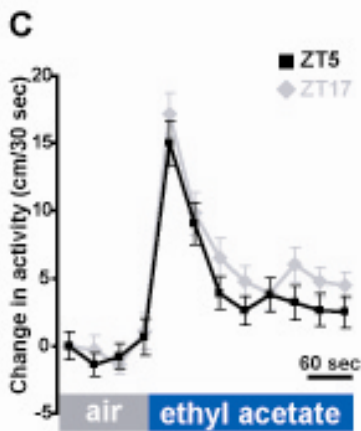

Supplement: pnas_0605321104_3.pdf [file pnas_0605321104_3.pdf]

## STATIONARY ODOR SOURCE ASSAY

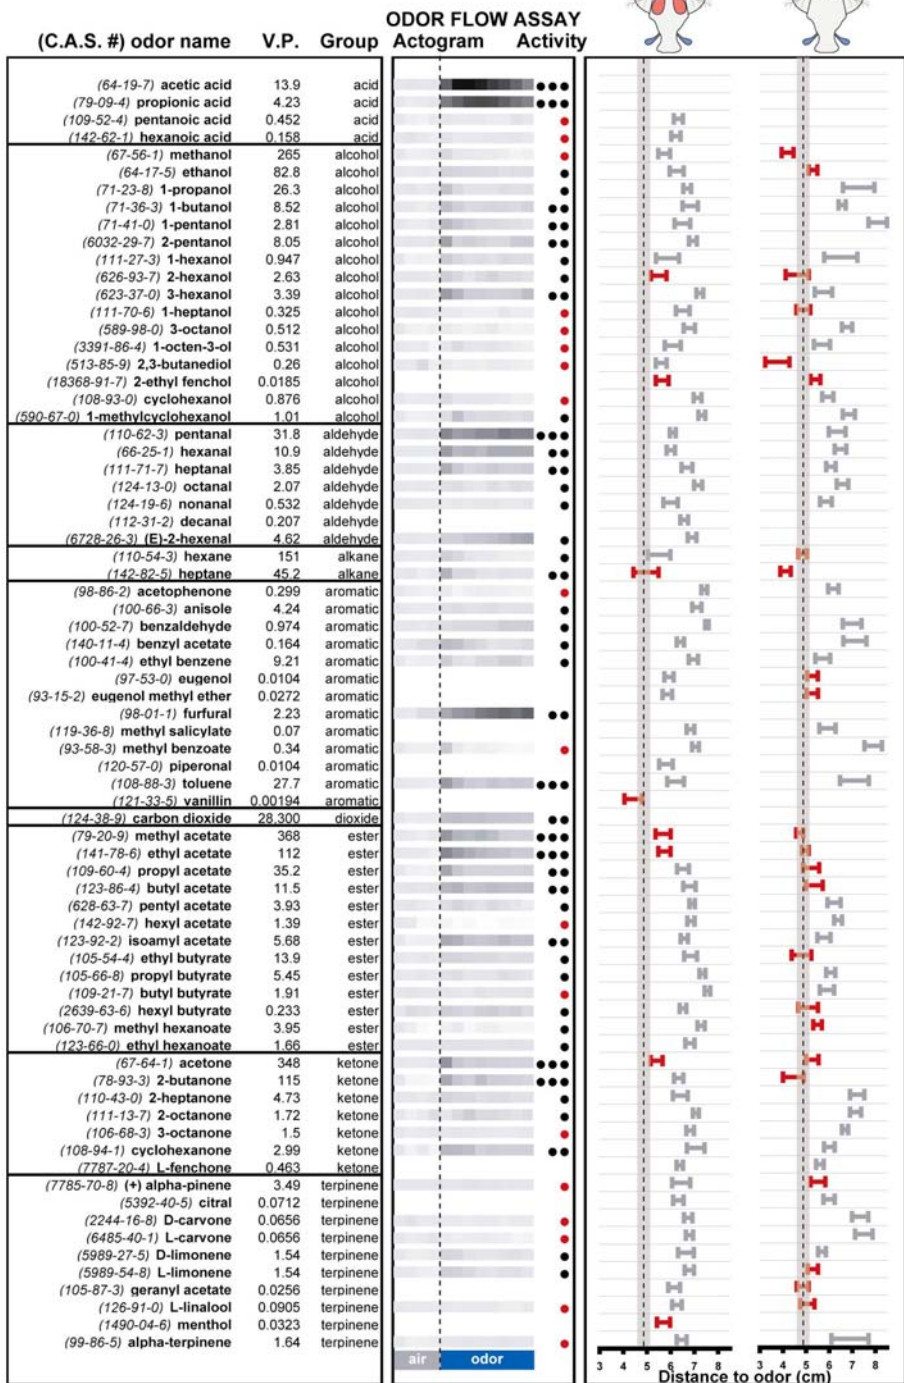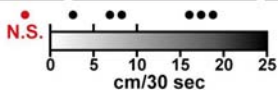

p<0.05

N.S. p>0.05

Supplement: pnas_0605321104_5.pdf [file pnas_0605321104_5.pdf]

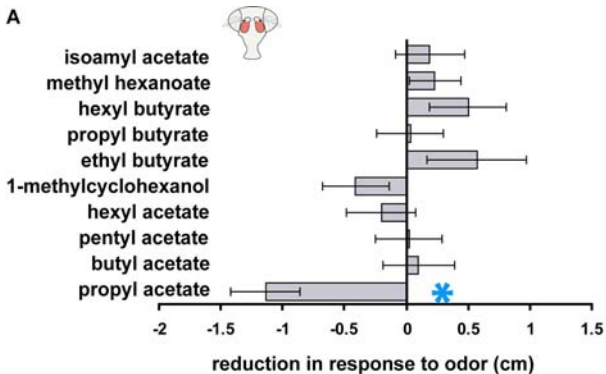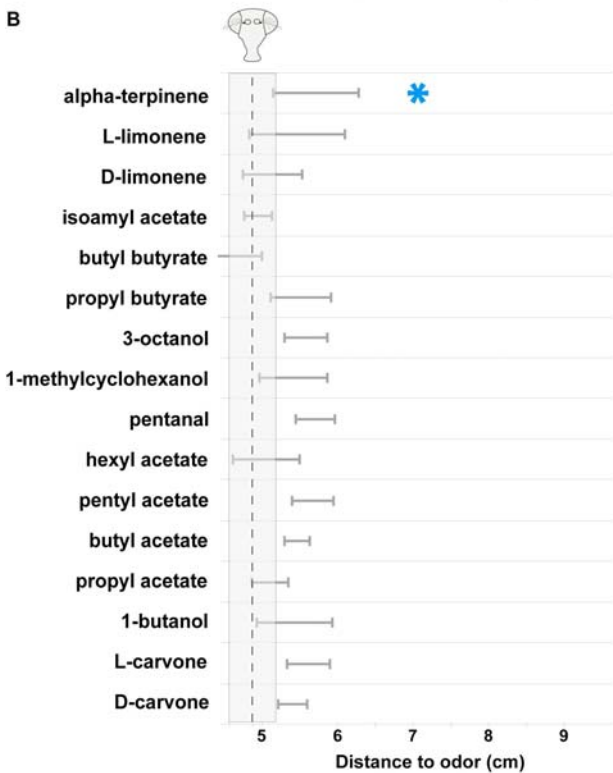

Supplement: pnas_0605321104_7.pdf [file pnas_0605321104_7.pdf]

**A**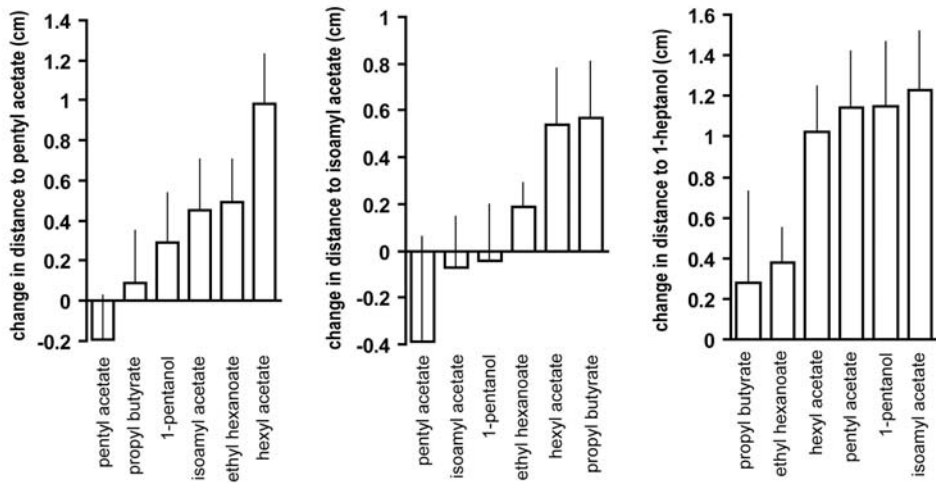**B**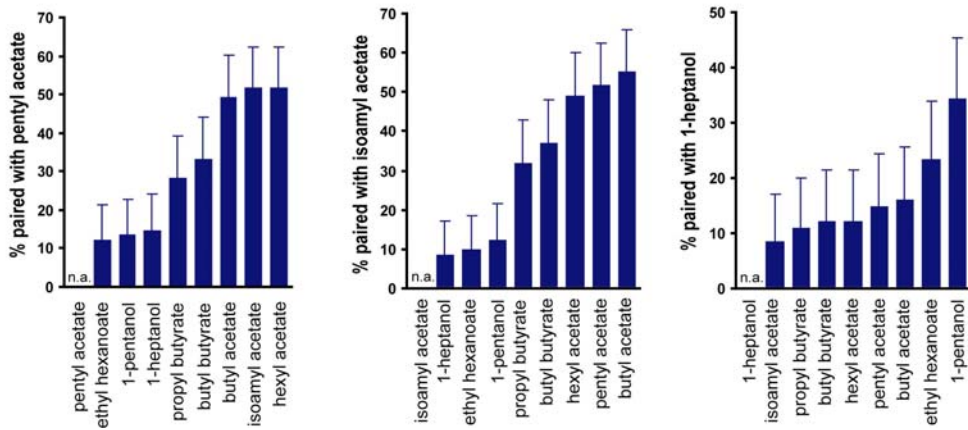

Supplement: pnas_0605321104_8.pdf [file pnas_0605321104_8.pdf]

**A**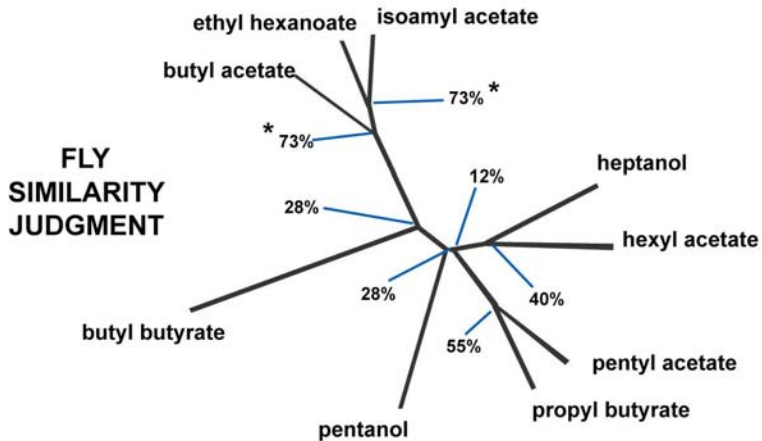**B**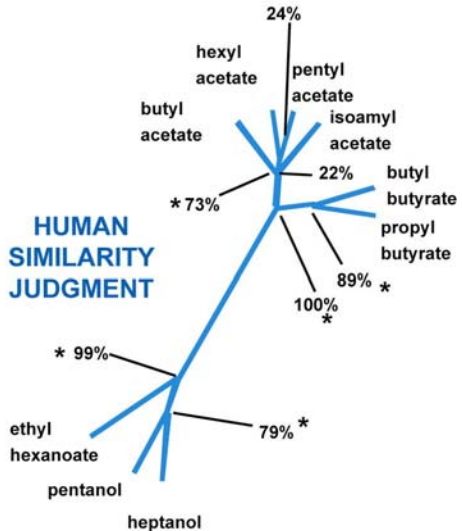

Supplement: pnas_0605321104_9.pdf [file pnas_0605321104_9.pdf]
